# Supplementary material for: A genome-wide analysis of the lysophosphatidate acyltransferase (LPAAT) gene family in cotton: organization, expression, sequence variation, and association with seed oil content and fiber quality
Source: PubMed Central journal article supplement (PMC5333453; doi:10.1186/s12864-017-3594-9), 2017-03-01
Supplement: 12864_2017_3594_MOESM6_ESM.pdf [file 12864_2017_3594_MOESM6_ESM.pdf]

LPAAT1

Multiple sequence alignment of LPAAT1 protein from A-Gh, A-Gb2, A-Gb1, D-Gh, D-Gb1, and D-Gb2. The alignment shows conserved regions marked with asterisks and residue numbers (20, 40, 60, 80, 100, 120, 140, 160, 180, 200, 220, 240, 260, 280, 300, 320, 340, 360, 380, 400, 420, 440, 460, 480, 500, 520, 540, 560, 580, 600, 620, 640, 660, 680, 700, 720, 740, 760, 780, 800, 820, 840, 860, 880, 900, 920, 940, 960, 980, 1000, 1020, 1040, 1060, 1080). The alignment is presented in blocks of 20 residues, with sequence identifiers and residue counts on the left and right sides. Conserved regions are highlighted with asterisks and residue numbers. The alignment shows high conservation across all species, particularly in the regions marked with asterisks. The alignment is presented in blocks of 20 residues, with sequence identifiers and residue counts on the left and right sides. Conserved regions are highlighted with asterisks and residue numbers. The alignment shows high conservation across all species, particularly in the regions marked with asterisks.

**LPAAT2**

\* 20 \* 40 \* 60 \* 80 \* 100 \*

A-GhLPAAT2 : ATGGCGATTGCAGCGGCAGCTGTTATCGTCCCATTTGGGCCTTCTTTTCTTCATCTCCGGCCTCGCTGTGAATCTCATTTCAGGCA GTATGCTTTGTTCTTATTCCGACCACTGT : 112

A-Gb2-LPAAT2 : ATGGCGATTGCAGCAGCAACCGTCAATCGTCCCATTTGGGCATTCTTTTCTTCATCTCTGGCCTTGTGTCAATTTTCATTTCAGGCGGTATGCTTTGTTCTCATTCCGCGCTCTGT : 112

D-GhLPAAT2 : ATGGCGATTGCAGCGGCAGCTGTTATCGTCCCATTTGGGCCTTCTTTTCTTCATCTCCGGCCTCGCTGTGAATCTCATTTCAGGCA GTATGCTTTGTTCTTATTCCGACCACTGT : 112

D-Gb2-LPAAT2 : ATGGCGATTGCAGCGGCAGCTGTTATCGTCCCATTTGGGCCTTCTTTTCTTCATCTCCGGCCTCGCTGTGAATCTCATTTCAGGCA GTATGCTTTGTTCTTATTCCGACCACTGT : 112

ATGGCGATTGCAGCgGCAGcTgTtATCGTCCCATTTGGGCcTTCTTTTCTTCATCTCcGGCCTcGcTGTgAATcTCATTTCAGGCAgGTATGCTTTGTTCTtATTCCGACCaCTGT

120 \* 140 \* 160 \* 180 \* 200 \* 220

A-GhLPAAT2 : CCAAGAACACATATAGAAAAGATCAATAGGGTATTTGGCAGAGTTGTTGTGGCTGCAACTGTTTGGCTGTTGATTGGTGGGCTGGCGTTAAGATTGAAGTCTTCGCAGATCA : 224

A-Gb2-LPAAT2 : CCAAGAACAGCTATAGAAAAGATCAATCGTGTGTTGGCAGAGTTGTTGTGGCTTCAACTTGTATGGCTTGTGATTGGTGGGCAAGGAGTTAAGATTAAAGTCTTCGCAGATAA : 224

D-GhLPAAT2 : CCAAGAACACATATAGAAAAGATCAATAGGGTATTTGGCAGAGTTGTTGTGGCTGCAACTAGTTTGGCTGTTGATTGGTGGGCAAGCGTTAAGATTGAAGTCTTCGCAGATCA : 224

D-Gb2-LPAAT2 : CCAAGAACACATATAGAAAAGATCAATAGGGTATTTGGCAGAGTTGTTGTGGCTGCAACTAGTTTGGCTGTTGATTGGTGGGCAAGCGTTAAGATTGAAGTCTTCGCAGATCA : 224

CCAAGAACaCaTATAGAAAAGATCAATaGgGTatTTGGCAGAGTTGTTGTGGCTgCAACT GTtTGGCTgGTTGATTGGTGGGCaGGcGTTAAGATTgAaGTgTTCGCAGATcA

\* 240 \* 260 \* 280 \* 300 \* 320 \*

A-GhLPAAT2 : TGAAAGCTTCAATTTAATGGGTAAGGAACATGCCCTTCTCATATGCAATCACAGAAGTGATATTGATTGGTTAGTTGGATGGGTTTTAGCACAGAGGTCAGGTTGTCTTGGC : 336

A-Gb2-LPAAT2 : TGAAAGCTTCAATTTAATGGGTAAGGAACACGCCCTTCTCTTACC CAATCACAGAAGTGATATTGATTGGTTAGTTGGATGGGTTCTGGCTCAGCGATCAGGTTGTCTTGGC : 336

D-GhLPAAT2 : TGAAAGCTTCAATTTAATGGGTAAGGAACATGCCCTTCTCATATGCAATCACAGAAGTGATATTGATTGGTTAGTTGGATGGGTTTTAGCACAGAGGTCAGGTTGTCTTGGC : 336

D-Gb2-LPAAT2 : TGAAAGCTTCAATTTAATGGGTAAGGAACATGCCCTTCTCATATGCAATCACAGAAGTGATATTGATTGGTTAGTTGGATGGGTTTTAGCACAGAGGTCAGGTTGTCTTGGC : 336

TGAAAGCTTCAATTTAATGGGTAAGGAACAtGCCCTTgTCaTAtgCAATCACAGAAGTGATATTGATTGGTTAGTTGGATGGGTTtTaGCaCAGaGgTCAGGTTGTCTTGGC

340 \* 360 \* 380 \* 400 \* 420 \* 440

A-GhLPAAT2 : AGTACATTAGCTGTAATGAAGAAATCATCAAAATTCCTGCCGGTCATAGGTGGTCAATGTGGTTTTCTGAGTATCTGTTTTTGGAACGAAGCTGGGCCAAGGATGAAAACA : 448

A-Gb2-LPAAT2 : AGTTCAAATAGCTGTGATGAAGAAATCATCAAAATTCCTTCCGGTCATAGGC TGGTCAATGTGGTTTTCTGAGTATCTGTTTTTGGAACGAAGCTGGGCCAAGGATGAAAACA : 448

D-GhLPAAT2 : AGTACATTAGCTGTAATGAAGAAATCATCAAAATTCCTGCCGGTCATAGGTGGTCAATGTGGTTTTCTGAGTATCTGTTTTTGGAACGAAGCTGGGCCAAGGATGAAAACA : 448

D-Gb2-LPAAT2 : AGTACATTAGCTGTAATGAAGAAATCATCAAAATTCCTGCCGGTCATAGGTGGTCAATGTGGTTTTCTGAGTATCTGTTTTTGGAACGAAGCTGGGCCAAGGATGAAAACA : 448

AGTAcAtTAGCTGTaATGAAGAAATCATCAAAATTCCTgCCGGTCATAGGtTGGTCAATGTGGTTTTCTGAGTATCTGTTTTTGGAACGAAGCTGGGCCAAGGATGAAAACA

\* 460 \* 480 \* 500 \* 520 \* 540 \* 560

A-GhLPAAT2 : CATTAAGGCAGGCTTCAACGTTTAAAGGACTTCCACGGCCATTTTGGTTGGCACTTTTTGTAGAAGGAAGTTCGTTTACACAAGCAAAGCTTCTAGCAGCTCAAGAATA : 560

A-Gb2-LPAAT2 : CGATAAAGGCAGGCTTCAACGTTTAAAGGACTATCCACAGCCGTTTTTGGTTGGCGCTTTTTGTAGAAGGAAGTTCGTTTACGCAAGCAAAGCTTGTAGCAGCTCAAGAATA : 560

D-GhLPAAT2 : CATTAAGGCAGGTAATCAACGTTTAAAGGACTTCCACGGCCATTTTGGTTGGCACTTTTTGTAGAAGGAAGTTCGTTTACACAAGCAAAGCTTCTAGCAGCTCAAGAATA : 560

D-Gb2-LPAAT2 : CATTAAGGCAGGTAATCAACGTTTAAAGGACTTCCACGGCCATTTTGGTTGGCACTTTTTGTAGAAGGAAGTTCGTTTACACAAGCAAAGCTTCTAGCAGCTCAAGAATA : 560

CatTAAAGGCAGGtTTCAACGTTTAAAGGACTtCCACgGCCaTTTTTGGTTGGCaCTTTTTGTAGAAGGAAGTTCGgTTTACaCAAGCAAAGCTTcTAGCAGCTCAAGAATA

\* 580 \* 600 \* 620 \* 640 \* 660 \*

A-GhLPAAT2 : TGCAACCTCACAAGGATTGCCGTGACCTAGAAATGTTTTAATTCCTCGTACTAAGGGTTTTGTTTCAGCTSTAAGTCATATGCGTTTCATTGTTCAGCCATTTATGATATG : 672

A-Gb2-LPAAT2 : TGCGACCTCACAAGGATTGCCAATACCTAGAAACGTTTTGATTCCCTCGTACAAAGGGTTTTGTTTCAGCTSTAAGTCATATGCGATTCATTGTTCAGCCATTTATGATATT : 672

D-GhLPAAT2 : TGCAACCTCACAAGGATTGCCGTGACCTAGAAATGTTTTAATTCCTCGTACTAAGGGTTTTGTTTCAGCTSTAAGTCATATGCGTTTCATTGTTCAGCCATTTATGATATG : 672

D-Gb2-LPAAT2 : TGCAACCTCACAAGGATTGCCGTGACCTAGAAATGTTTTAATTCCTCGTACTAAGGGTTTTGTTTCAGCTSTAAGTCATATGCGTTTCATTGTTCAGCCATTTATGATATG : 672

TGCaACCTCACAAGGATTGCCgtTACCTAGAAAtGTTTTaATTCCTCGTACTaAAGGGTTTTGTTTCAGCTSTAAGTCATATGCGtTCATTGTtCCAGCtATTTATGATATg

680 \* 700 \* 720 \* 740 \* 760 \* 780

A-GhLPAAT2 : ACAGTGGCTATTCCTAAAAGCTCACCTTCACCTACAATGCTTAGACTTTTCAAGGGACAATCTTCTGTGGTGCATGTGCATGTCAAGCGGCGTCTTATGAAGGAACTTCCTG : 784

A-Gb2-LPAAT2 : ACAGTGGCTATTCCTAAAAGCTCACCTTCACCTACAATGCTTAGACTTTTCAAGGGGCAATCTTCTGTGGTGCATGTGCATATCAAAACGATGCCTCATGAAGGAACTGCCTG : 784

D-GhLPAAT2 : ACAGTGGCTATTCCTAAAAGCTCACCTTCACCTACAATGCTTAGACTTTTCAAGGGACAATCTTCTGTGGTGCATGTGCATGTCAAGCGGCGTCTTATGAAGGAACTTCCTG : 784

D-Gb2-LPAAT2 : ACAGTGGCTATTCCTAAAAGCTCACCTTCACCTACAATGCTTAGACTTTTCAAGGGACAATCTTCTGTGGTGCATGTGCATGTCAAGCGGCGTCTTATGAAGGAACTTCCTG : 784

ACAGTGGCtATtCCtAAAAGcTTCACCTTCACCTACAATGCTTAGACTTTTCAAGGGaCAATCTTCTGTGGTgCATGTgCATgTCAAGCGgGtCTtATGAAGGAACTtCCTG

\* 800 \* 820 \* 840 \* 860 \* 880 \*

A-GhLPAAT2 : AAACGATGAGGCTGTTGCACAATGGTGTAAAGATCTTTTTGTGAGAGAAAGATTAAGTTGTTGGACAAGCATATAGCTGAGGACACTTTTCAGTGACCAACCATTGCAGGATAC : 896

A-Gb2-LPAAT2 : AAATGATGAGGCTGTTGCACAATGGTGTAAAGATCTGTTTTGTGGAGAAAGGACAAGTTGCTGGACAACATAGAGCTGAGGACACTTTTCAGTGACCAACCATTGCAGGATAT : 896

D-GhLPAAT2 : AAACGATGAGGATGTTGCACAATGGTGTAAAGATCTTTTTGTGAGAGAAAGACAAGTTGTTGGACAAGCATATAGCTGAGGACACTTTTCAGTGACCAACCATTGCAGGATAT : 896

D-Gb2-LPAAT2 : AAACGATGAGGCTGTTGCACAATGGTGTAAAGATCTTTTTGTGAGAGAAAGACAAGTTGTTGGACAAGCATATAGCTGAGGACACTTTTCAGTGACCAACCATTGCAGGATAT : 896

AAAcGATGAGGcTGTGTCACAATGGTGTAAAGATCTtTTTTGTGgAGAAAGAcAAGTTGtTGGACAAGcATATaAGCTGAGGACACTTTTCAGTGACCAACCATTGCAGGATAt

900 \* 920 \* 940 \* 960 \* 980 \* 1000

A-GhLPAAT2 : CGGTTCGGCCATTAATCTCTTCTGGTTGTTGCTTCTTGGGCATGTCTTGTGGCTTATGGAGCTTATAATTTTCTGCAATGGTCTTCACTTTTATCATCATGGAAAGGGCTT : 1008

A-Gb2-LPAAT2 : TGGTTCGGCCAGCTAAGCCTCTTCTGGTTGTTGCTTCTTGGGCATGTATTGTGGCTTACGGGGCTCTCAAGTTTCTGCAACGGTCTTCCCTTTTATCCATGGAAGGGTATT : 1008

D-GhLPAAT2 : CGGTTCGGCCATTAATCTCTTCTGGTTGTTGCTTCTTGGGCATGTCTTGTGGCTTATGGAGCTTATAATTTTCTGCAATGGTCTTCACTTTTATCATCATGGAAAGGGATT : 1008

D-Gb2-LPAAT2 : CGGTTCGGCCATTAATCTCTTCTGGTTGTTGCTTCTTGGGCATGTCTTGTGGCTTATGGAGCTTATAATTTTCTGCAATGGTCTTCACTTTTATCATCATGGAAAGGGATT : 1008

cGGTTCGGCCatTAAatCTCTTCTGGTTGTTgctTCTTGGGCATGTcTTGTGGcTTAtGGaGCTtatAAatTTTCTgCAAtGGTCTTCACTTTTATCaTCATGGAAaGGgATT

\* 1020 \* 1040 \* 1060 \* 1080 \* 1100 \* 1120

A-GhLPAAT2 : GCATTGTCAGCAGTTGGGTTGGCTATTGTTACCAATACTTATGCAAATCATGATCCTCTTCTCACAGTCTGAGCGTTCAACTACTGCTAAGGTTGCACCTGGGAAGCCCAAGA : 1120

A-Gb2-LPAAT2 : GCATTGTCAGCATTCATCTTGGCCATCGTCACTTCTCATGCAAATATTGATTCTCTTCACTCAGTCCGAGCGTTCAACCCTGCTAAGGTTGCACCGGGAAAGCCCAAGA : 1119

D-GhLPAAT2 : GCATTGTCAGCAGTTGGGTTGGCTATTGTTACCAATACTCATGCAAATCATGATCCTATTCTCACAGTCTGAGCGTTCAACTCCTGCTAAGGTTGCACCTGGGAAGCCCAAGA : 1120

D-Gb2-LPAAT2 : GCATTGTCAGCAGTTGGGTTGGCTATTGTTACCAATACTCATGCAAATCATGATCCTATTCTCACAGTCTGAGCGTTCAACTCCTGCTAAGGTTGCACCTGGGAAGCCCAAGA : 1120

GCATTGTCAGCAGTtgggTTGGCTAtTgTtACCaTaCTcATGCAAATcaTGATcCT TTCTCaCAGTCTgAGCGTTCAACTcCTGCTaAGGTTGCACcTGGgAAGCCcAaGA

\* 1140 \* 1160

A-GhLPAAT2 : ACAACAGTGAGAGTTCAGAGGCAAGACGAGACAAGCAGCAGTAG : 1164

A-Gb2-LPAAT2 : ATGACAGGGAGAGTTCAGCAGCAATAG----- : 1146

D-GhLPAAT2 : ACAACAGTGAGAGTTCAGAGGCAAGACGAGACAAGCAGCAGTAG : 1164

D-Gb2-LPAAT2 : ACAACAGTGAGAGTTCAGAGGCAAGACGAGACAAGCAGCAGTAG : 1164

AcaACAGtGAGAGTTCAGagGCAAgAcgagacaagcagcagtag

**LPAAT4**

A-Gh-LPAAT4 : ATGGAAGTATGCAGACCTTTGAAAAACAGATGATAAAAT-TAAAGCACCGCCCTTTGAAATCCATATCGGTTTTTTAG---GGGTATGATATGTTTAGTGGTTCCTCTCTACC : 108  
A-Gb1-LPAAT4 : ATGGAAGTATGCAGACCTTTGAAAAACAGATGATAAAAT-TAAAGCACCGCCCTTTGAAATCCATATCGGTTTTTTAG---GGGTATGATATGTTTAGTGGTTCCTCTCTACC : 108  
A-Gb2-LPAAT4 : ATGGAAGCACTATTAGCTGTACCGAGCTGTAACTCTTGTGTCAGCATTTGACTCATTCCTTTGAGGATGACAGCTGAGACGGGTTGAATCTTTGAACAGCTGCCCAAAACAAA : 112  
D-Gh-LPAAT4 : ATGGAAGTATGCAGACCTTTGAAAAACAGATGATAAAAT-TAAAGCACCGCCCTTTGAAATCCATATCGGTTTTTTAG---GGGTATGATATGTTTAGTGGTTCCTCTCTACC : 108  
D-Gb1-LPAAT4 : ATGGAAGTATGCAGACCTTTGAAAAACAGATGATAAAAT-TAAAGCACCGCCCTTTGAAATCCATATCGGTTTTTTAG---GGGTATGATATGTTTAGTGGTTCCTCTCTACC : 108  
D-Gb2-LPAAT4 : ATGGAAGCGCTATTAGCTGTACCAAGCTGTAACTCTTGTGTCAGCATTTGACTCATTCCTTTGAGGATGACAGCTGAGACGGGTTGAATCTTTGAACAGCTGCCCAAAACAAA : 112  
ATGGAAG a A CT T aA T A T T AgCA G C T T G T AG GGGT AT TT A G CC A

A-Gh-LPAAT4 : GCCTTTATGT-----TGTTAGCA-TATTTAGGA-CCCGGGGCTGTCCTATTCCGATATCTCAGCATACTACTCTAGAAAAGCAACATCCTT : 194  
A-Gb1-LPAAT4 : GCCTTTATGT-----TGTTAGCA-TATTTAGGA-CCCGGGGCTGTCCTATTCCGATATCTCAGCATACTACTCTAGAAAAGCAACATCCTT : 194  
A-Gb2-LPAAT4 : GATATGGAA-----TGTTAGCA-TATTTAGGA-CCCGGGGCTGTCCTATTCCGATATCTCAGCATACTACTCTAGAAAAGCAACATCCTT : 182  
D-Gh-LPAAT4 : GCCTTTATGT-----TGTTAGCA-TATTTAGGA-CCCGGGGCTGTCCTATTCCGATATCTCAGCATACTACTCTAGAAAAGCAACATCCTT : 194  
D-Gb1-LPAAT4 : GCCTTTATGT-----TGTTAGCA-TATTTAGGA-CCCGGGGCTGTCCTATTCCGATATCTCAGCATACTACTCTAGAAAAGCAACATCCTT : 194  
D-Gb2-LPAAT4 : GATATGGAA-TGGTTCCTCTCTACCGCCTTTATGT-TGTTAGCA-TATTTAGGA-CCCGGGGCTGTCCTATTCCGATATCTCAGCATACTACTCTAGAAAAGCAACATCCTT : 224  
G T t t g t t a g c t a t t t a g g C C C G G G G C T G T C C T A T T C G A T A T C T C A G C A T A C T A C T A C T C T A G A A A A G C A A C A T C C T T

A-Gh-LPAAT4 : CTTCTTTGGCCTATGGCTATCCATGTGGCCTTTTCTTTTCGAAAAAATAAAATGGCACCAAAGTGGTTTTCTCTGGGGACGATGTTCCCTCGTAAGGAACG-TATTCTAATCATC : 306  
A-Gb1-LPAAT4 : CTTCTTTGGCCTATGGCTATCCATGTGGCCTTTTCTTTTCGAAAAAATAAAATGGCACCAAAGTGGTTTTCTCTGGGGACGATGTTCCCTCGTAAGGAACG-TATTCTAATCATC : 306  
A-Gb2-LPAAT4 : CTTCTTTGGCCTATGGCTATCCATGTGGCCTTTTCTTTTCGAAAAAATAAAATGGCACCAAAGTGGTTTTCTCTGGGGACGATGTTCCCTCGTAAGGAACG-TATTCTAATCATC : 294  
D-Gh-LPAAT4 : CTTCTTTGGCCTATGGCTATCCATGTGGCCTTTTCTTTTCGAAAAAATAAAATGGCACCAAAGTGGTTTTCTCTGGGGACGATGTTCCCTCGTAAGGAACG-TATTCTAATCATC : 306  
D-Gb1-LPAAT4 : CTTCTTTGGCCTATGGCTATCCATGTGGCCTTTTCTTTTCGAAAAAATAAAATGGCACCAAAGTGGTTTTCTCTGGGGACGATGTTCCCTCGTAAGGAACG-TATTCTAATCATC : 306  
D-Gb2-LPAAT4 : CTTCTTTGGCCTATGGCTATCCATGTGGCCTTTTCTTTTCGAAAAAATAAAATGGCACCAAAGTGGTTTTCTCTGGGGACGATGTTCCCTCGTAAGGAACG-TATTCTAATCATC : 336  
CTTCTTTGGCCTATGGCTATCCATGTGGCCTTTTCTTTTCGAAAAAATAAAATGGCACCAAAGTGGTTTTCTCTGGGGACGATGTTCCCTCGTAAGGAACG-TATTCTAATCATC

A-Gh-LPAAT4 : GTTAATCACAGAACC GAAGTTGATTGGATGTA-CTATGGGATCTCGCGATGCGAAAAGGCTGCTTGGGCTACATCAAGTATATCCTTAAAAGCAGCTTGATGAAACTACCTG : 418  
A-Gb1-LPAAT4 : GTTAATCACAGAACC GAAGTTGATTGGATGTA-CTATGGGATCTCGCGATGCGAAAAGGCTGCTTGGGCTACATCAAGTATATCCTTAAAAGCAGCTTGATGAAACTACCTG : 418  
A-Gb2-LPAAT4 : GTTAATCACAGAACC GAAGTTGATTGGATGTA-CTATGGGATCTCGCGATGCGAAAAGGCTGCTTGGGCTACATCAAGTATATCCTTAAAAGCAGCTTGATGAAACTACCTG : 406  
D-Gh-LPAAT4 : GTTAATCACAGAACC GAAGTTGATTGGATGTA-CTATGGGATCTCGCGATGCGAAAAGGCTGCTTGGGCTACATCAAGTATATCCTTAAAAGCAGCTTGATGAAACTACCTG : 418  
D-Gb1-LPAAT4 : GTTAATCACAGAACC GAAGTTGATTGGATGTA-CTATGGGATCTCGCGATGCGAAAAGGCTGCTTGGGCTACATCAAGTATATCCTTAAAAGCAGCTTGATGAAACTACCTG : 418  
D-Gb2-LPAAT4 : GTTAATCACAGAACC GAAGTTGATTGGATGTA-CTATGGGATCTCGCGATGCGAAAAGGCTGCTTGGGCTACATCAAGTATATCCTTAAAAGCAGCTTGATGAAACTACCTG : 448  
GTTAATCACAGAACC GAAGTTGATTGGATGTA-CTATGGGATCTCGCGATGCGAAAAGGCTGCTTGGGCTACATCAAGTATATCCTTAAAAGCAGCTTGATGAAACTACCTG

A-Gh-LPAAT4 : TTCTTGTTGGGGATTTTCATGTCTTGGAGTTCATTTCCG-TAGATAGGAAGTGGGAAACCGATGAAACTATCCTCCATCAAATGCTTTTCGACTTTTAAAGAAATCCTCGAGATCC : 530  
A-Gb1-LPAAT4 : TTCTTGTTGGGGATTTTCATGTCTTGGAGTTCATTTCCG-TAGATAGGAAGTGGGAAACCGATGAAACTATCCTCCATCAAATGCTTTTCGACTTTTAAAGAAATCCTCGAGATCC : 530  
A-Gb2-LPAAT4 : TTCTTGTTGGGGATTTTCATGTCTTGGAGTTCATTTCCG-TAGATAGGAAGTGGGAAACCGATGAAACTATCCTCCATCAAATGCTTTTCGACTTTTAAAGAAATCCTCGAGATCC : 518  
D-Gh-LPAAT4 : TTCTTGTTGGGGATTTTCATGTCTTGGAGTTCATTTCCG-TAGATAGGAAGTGGGAAACCGATGAAACTATCCTCCATCAAATGCTTTTCGACTTTTAAAGAAATCCTCGAGATCC : 530  
D-Gb1-LPAAT4 : TTCTTGTTGGGGATTTTCATGTCTTGGAGTTCATTTCCG-TAGATAGGAAGTGGGAAACCGATGAAACTATCCTCCATCAAATGCTTTTCGACTTTTAAAGAAATCCTCGAGATCC : 530  
D-Gb2-LPAAT4 : TTCTTGTTGGGGATTTTCATGTCTTGGAGTTCATTTCCG-TAGATAGGAAGTGGGAAACCGATGAAACTATCCTCCATCAAATGCTTTTCGACTTTTAAAGAAATCCTCGAGATCC : 560  
TTCTTGTTGGGGATTTTCATGTCTTGGAGTTCATTTCCG-TAGATAGGAAGTGGGAAACCGATGAAACTATCCTCCATCAAATGCTTTTCGACTTTTAAAGAAATCCTCGAGATCC

A-Gh-LPAAT4 : TTTATGGCTTGCTCTTTTCCCCGAAGGAACGATTTTACTGAAGAAAAATGCGAGAAGAGTAAAAAATTTGCAGCTGAAGTCGGATTGCCGGTGTGACAAATGTGCTGCTA : 642  
A-Gb1-LPAAT4 : TTTATGGCTTGCTCTTTTCCCCGAAGGAACGATTTTACTGAAGAAAAATGCGAGAAGAGTAAAAAATTTGCAGCTGAAGTCGGATTGCCGGTGTGACAAATGTGCTGCTA : 642  
A-Gb2-LPAAT4 : TTTATGGCTTGCTCTTTTCCCCGAAGGAACGATTTTACTGAAGAAAAATGCGAGAAGAGTAAAAAATTTGCAGCTGAAGTCGGATTGCCGGTGTGACAAATGTGCTGCTA : 630  
D-Gh-LPAAT4 : TTTATGGCTTGCTCTTTTCCCCGAAGGAACGATTTTACTGAAGAAAAATGCGAGAAGAGTAAAAAATTTGCAGCTGAAGTCGGATTGCCGGTGTGACAAATGTGCTGCTA : 642  
D-Gb1-LPAAT4 : TTTATGGCTTGCTCTTTTCCCCGAAGGAACGATTTTACTGAAGAAAAATGCGAGAAGAGTAAAAAATTTGCAGCTGAAGTCGGATTGCCGGTGTGACAAATGTGCTGCTA : 642  
D-Gb2-LPAAT4 : TTTATGGCTTGCTCTTTTCCCCGAAGGAACGATTTTACTGAAGAAAAATGCGAGAAGAGTAAAAAATTTGCAGCTGAAGTCGGATTGCCGGTGTGACAAATGTGCTGCTA : 672  
TTTATGGCTTGCTCTTTTCCCCGAAGGAACGATTTTACTGAAGAAAAATGCGAGAAGAGTAAAAAATTTGCAGCTGAAGTCGGATTGCCGGTGTGACAAATGTGCTGCTA

A-Gh-LPAAT4 : CCGAAAACAAGGGGTTTCTGCCTTTGCTTAGAAAACACTTAGGGGCTCTTTTGATGCAGTTTACGATTTGACTATCGCATAACAAGCGCCAATGCCCTTCTTCCTCGACAACTG : 754  
A-Gb1-LPAAT4 : CCGAAAACAAGGGGTTTCTGCCTTTGCTTAGAAAACACTTAGGGGCTCTTTTGATGCAGTTTACGATTTGACTATCGCATAACAAGCGCCAATGCCCTTCTTCCTCGACAACTG : 754  
A-Gb2-LPAAT4 : CCGAAAACAAGGGGTTTCTGCCTTTGCTTAGAAAACACTTAGGGGCTCTTTTGATGCAGTTTACGATTTGACTATCGCATAACAAGCGCCAATGCCCTTCTTCCTCGACAACTG : 739  
D-Gh-LPAAT4 : CCGAAAACAAGGGGTTTCTGCCTTTGCTTAGAAAACACTTAGGGGCTCTTTTGATGCAGTTTACGATTTGACTATCGCATAACAAGCGCCAATGCCCTTCTTCCTCGACAACTG : 754  
D-Gb1-LPAAT4 : CCGAAAACAAGGGGTTTCTGCCTTTGCTTAGAAAACACTTAGGGGCTCTTTTGATGCAGTTTACGATTTGACTATCGCATAACAAGCGCCAATGCCCTTCTTCCTCGACAACTG : 754  
D-Gb2-LPAAT4 : CCGAAAACAAGGGGTTTCTGCCTTTGCTTAGAAAACACTTAGGGGCTCTTTTGATGCAGTTTACGATTTGACTATCGCATAACAAGCGCCAATGCCCTTCTTCCTCGACAACTG : 784  
CCGAAAACAAGGGGTTTCTGCCTTTGCTTAGAAAACACTTAGGGGCTCTTTTGATGCAGTTTACGATTTGACTATCGCATAACAAGCGCCAATGCCCTTCTTCCTCGACAACTG

A-Gh-LPAAT4 : TATTGGCGTCGATCCATCGGAGGTTACATCCACATACAACGTATCCCATCAACAACATCCCAACCTCCGATGCCGAGGCCGCTGCGTGGTTAACCAATAGGTTCAAAGT : 866  
A-Gb1-LPAAT4 : TATTGGCGTCGATCCATCGGAGGTTACATCCACATACAACGTATCCCATCAACAACATCCCAACCTCCGATGCCGAGGCCGCTGCGTGGTTAACCAATAGGTTCAAAGT : 866  
A-Gb2-LPAAT4 : TATTGGCGTCGATCCATCGGAGGTTACATCCACATACAACGTATCCCATCAACAACATCCCAACCTCCGATGCCGAGGCCGCTGCGTGGTTAACCAATAGGTTCAAAGT : 851  
D-Gh-LPAAT4 : TATTGGCGTCGATCCATCGGAGGTTACATCCACATACAACGTATCCCATCAACAACATCCCAACCTCCGATGCCGAGGCCGCTGCGTGGTTAACCAATAGGTTCAAAGT : 866  
D-Gb1-LPAAT4 : TATTGGCGTCGATCCATCGGAGGTTACATCCACATACAACGTATCCCATCAACAACATCCCAACCTCCGATGCCGAGGCCGCTGCGTGGTTAACCAATAGGTTCAAAGT : 866  
D-Gb2-LPAAT4 : TATTGGCGTCGATCCATCGGAGGTTACATCCACATACAACGTATCCCATCAACAACATCCCAACCTCCGATGCCGAGGCCGCTGCGTGGTTAACCAATAGGTTCAAAGT : 896  
TATTGGCGTCGATCCATCGGAGGTTACATCCACATACAACGTATCCCATCAACAACATCCCAACCTCCGATGCCGAGGCCGCTGCGTGGTTAACCAATAGGTTCAAAGT

A-Gh-LPAAT4 : GAAAGACGAAATGCTCTCGGATTTCAAATCTCAGGGCCAATTCCCTGATCAAAAAACCGAAGAACAACCTCTCTACATTGCAATCCTTGCTAAATTTTACAGTGATCATTGCC : 978  
A-Gb1-LPAAT4 : GAAAGACGAAATGCTCTCGGATTTCAAATCTCAGGGCCAATTCCCTGATCAAAAAACCGAAGAACAACCTCTCTACATTGCAATCCTTGCTAAATTTTACAGTGATCATTGCC : 978  
A-Gb2-LPAAT4 : GAAAGACGAAATGCTCTCGGATTTCAAATCTCAGGGCCAATTCCCTGATCAAAAAACCGAAGAACAACCTCTCTACATTGCAATCCTTGCTAAATTTTACAGTGATCATTGCC : 963  
D-Gh-LPAAT4 : GAAAGACGAAATGCTCTCGGATTTCAAATCTCAGGGCCAATTCCCTGATCAAAAAACCGAAGAACAACCTCTCTACATTGCAATCCTTGCTAAATTTTACAGTGATCATTGCC : 978  
D-Gb1-LPAAT4 : GAAAGACGAAATGCTCTCGGATTTCAAATCTCAGGGCCAATTCCCTGATCAAAAAACCGAAGAACAACCTCTCTACATTGCAATCCTTGCTAAATTTTACAGTGATCATTGCC : 978  
D-Gb2-LPAAT4 : GAAAGACGAAATGCTCTCGGATTTCAAATCTCAGGGCCAATTCCCTGATCAAAAAACCGAAGAACAACCTCTCTACATTGCAATCCTTGCTAAATTTTACAGTGATCATTGCC : 1008  
GAAAGACGAAATGCTCTCGGATTTCAAATCTCAGGGCCAATTCCCTGATCAAAAAACCGAAGAACAACCTCTCTACATTGCAATCCTTGCTAAATTTTACAGTGATCATTGCC

A-Gh-LPAAT4 : TTAACAACCAATTCACTTACCTAACATTTTCTTACAAGCTGTGTATGGTATATGTAAGCTTAGCTTGTCTATATCTTGCTTACATTACTCGTTGTAAAAATTTCCCTATGC : 1090  
A-Gb1-LPAAT4 : TTAACAACCAATTCACTTACCTAACATTTTCTTACAAGCTGTGTATGGTATATGTAAGCTTAGCTTGTCTATATCTTGCTTACATTACTCGTTGTAAAAATTTCCCTATGC : 1090  
A-Gb2-LPAAT4 : TTAACAACCAATTCACTTACCTAACATTTTCTTACAAGCTGTGTATGGTATATGTAAGCTTAGCTTGTCTATATCTTGCTTACATTACTCGTTGTAAAAATTTCCCTATGC : 1075  
D-Gh-LPAAT4 : TTAACAACCAATTCACTTACCTAACATTTTCTTACAAGCTGTGTATGGTATATGTAAGCTTAGCTTGTCTATATCTTGCTTACATTACTCGTTGTAAAAATTTCCCTATGC : 1090  
D-Gb1-LPAAT4 : TTAACAACCAATTCACTTACCTAACATTTTCTTACAAGCTGTGTATGGTATATGTAAGCTTAGCTTGTCTATATCTTGCTTACATTACTCGTTGTAAAAATTTCCCTATGC : 1090  
D-Gb2-LPAAT4 : TTAACAACCAATTCACTTACCTAACATTTTCTTACAAGCTGTGTATGGTATATGTAAGCTTAGCTTGTCTATATCTTGCTTACATTACTCGTTGTAAAAATTTCCCTATGC : 1120  
TTAACAACCAATTCACTTACCTAACATTTTCTTACAAGCTGTGTATGGTATATGTAAGCTTAGCTTGTCTATATCTTGCTTACATTACTCGTTGTAAAAATTTCCCTATGC

A-Gh-LPAAT4 : CTCTTGAAATTTTGCCTTTTGTAAAGGGAAAAAAAAGATGATTAA : 1134  
A-Gb1-LPAAT4 : CTCTTGAAATTTTGCCTTTTGTAAAGGGAAAAAAAAGATGATTAA : 1134  
A-Gb2-LPAAT4 : CTCTTGAAATTTTGCCTTTTGTAAAGGGAAAAAAAAGATGATTAA : 1119  
D-Gh-LPAAT4 : CTCTTGAAATTTTGCCTTTTGTAAAGGGAAAAAAAAGATGATTAA : 1134  
D-Gb1-LPAAT4 : CTCTTGAAATTTTGCCTTTTGTAAAGGGAAAAAAAAGATGATTAA : 1134  
D-Gb2-LPAAT4 : CTCTTGAAATTTTGCCTTTTGTAAAGGGAAAAAAAAGATGATTAA : 1164  
CTCTTGAAATTTTGCCTTTTGTAAAGGGAAAAAAAAGATGATTAA

LPAAT5

\* 20 \* 40 \* 60 \* 80 \* 100 \*

A-Gh-LPAAT5 : ATGGAAGTTCCAAAGTGC GAAACATGAAACAAGGCATCGTAGGTTGACCCCGCTTAGGGTGTTAAGGGGTCTGATATGTTTGCTAGTGTGCTTTTAACAGCTTTTATGATGA : 112

A-Gb2-LPAAT5 : ATGGAAGTTCCAAAGTGC GAAACATGAAACAAGGCATCGTAGGTTGACCCCGCTTAGGGTGTTAAGGGGTCTGATATGTTTGCTAGTGTGCTTTTAACAGCTTTTATGATGA : 112

D-Gh-LPAAT5 : ATGGAAGTTCCAAAGTGC GAAACATGAAACAAGGCATCGTAGGTTGACCCCGCTTAGGGTGTTAAGGGGTCTGATATGTTTGCTAGTGTGCTTTTAACAGCTTTTATGATGA : 112

D-Gb1-LPAAT5 : ATGGAAGTTCCAAAGTGC GAAACATGAAACAAGGCATCGTAGGTTGACCCCGCTTAGGGTGTTAAGGGGTCTGATATGTTTGCTAGTGTGCTTTTAACAGCTTTTATGATGA : 112

D-Gb2-LPAAT5 : ----- : -

atggaagttcc agtgcgaaacatgaaacaa gcatcgtaggttgaccccgcttagggtgttaaggggtctgatatgtttgctagtgttgcttttaacagcttttatgatga

120 \* 140 \* 160 \* 180 \* 200 \* 220

A-Gh-LPAAT5 : TAGTGTATTGTGGCTTTTTTAGTACTGTTGTATTGAGGCTTTTCAGCCTT CATTACAGCCGAAAAGTAACAGCTTTCTTCTTTAGTTCTTGGTTAGCATTATGGCCTTTTCT : 224

A-Gb2-LPAAT5 : TAGTGTATTGTGGCTTTTTTAGTACTGTTGTATTGAGGCTTTTCAGCCTT CATTACAGCCGAAAAGTAACAGCTTTCTTCTTTAGTTCTTGGTTAGCATTATGGCCTTTTCT : 224

D-Gh-LPAAT5 : TAGTGTATTGTGGCTTTTTTAGTACTGTTGTATTGAGGCTTTTCAGCCTT CATTACAGCCGAAAAGTAACAGCTTTCTTCTTTAGTTCTTGGTTAGCATTATGGCCTTTTCT : 224

D-Gb1-LPAAT5 : TAGTGTATTGTGGCTTTTTTAGTACTGTTGTATTGAGGCTTTTCAGCCTT CATTACAGCCGAAAAGTAACAGCTTTCTTCTTTAGTTCTTGGTTAGCATTATGGCCTTTTCT : 224

D-Gb2-LPAAT5 : ----- : -

tagtgtattgtggcttttttagtactgttgtattgaggcttttcagc t cattacagccgaaaagtaacagctttcttcttttagttcttggttagcattatggccttt ct

\* 240 \* 260 \* 280 \* 300 \* 320 \*

A-Gh-LPAAT5 : ATTTGAGAAAATAAACAAAACCAAGGTCATTTTTCTGGAGATGATGTTCTGCAAGGGAACGAGTTTTACTTATTTGCAACCACAGAACCTGAGGTTGACTGGATGTACCTG : 336

A-Gb2-LPAAT5 : ATTTGAGAAAATAAACAAAACCAAGGTCATTTTTCTGGAGATGATGTTCTGCAAGGGAACGAGTTTTACTTATTTGCAACCACAGAACCTGAGGTTGACTGGATGTACCTG : 336

D-Gh-LPAAT5 : ATTTGAGAAAATAAACAAAACCAAGGTCATTTTTCTGGAGATGATGTTCTGCAAGGGAACGAGTTTTACTTATTTGCAACCACAGAACCTGAGGTTGACTGGATGTACCTG : 336

D-Gb1-LPAAT5 : ATTTGAGAAAATAAACAAAACCAAGGTCATTTTTCTGGAGATGATGTTCTGCAAGGGAACGAGTTTTACTTATTTGCAACCACAGAACCTGAGGTTGACTGGATGTACCTG : 336

D-Gb2-LPAAT5 : ----- : -

at ttgagaaaataaacaacaaaccaaggtca tttttctggagatgatgttctctgcaaggggaacg gttttacttattttgcaaccacagaac gaggttgactggatgtac tg

340 \* 360 \* 380 \* 400 \* 420 \* 440

A-Gh-LPAAT5 : TGGGACTTGCATTGCGGAAAGATTCCCTGGGATACATAAAGTACATCCTTAAGAGCAGCTTAAATGAAATTACCTGTATTTGGTTGGTTCATTCCAAATTTTGGAGTTCATCC : 448

A-Gb2-LPAAT5 : TGGGACTTGCATTGCGGAAAGATTCCCTGGGATACATAAAGTACATCCTTAAGAGCAGCTTAAATGAAATTACCTGTATTTGGTTGGTTCATTCCAAATTTTGGAGTTCATCC : 448

D-Gh-LPAAT5 : TGGGACTTGCATTGCGGAAAGATTCCCTGGGATACATAAAGTACATCCTTAAGAGCAGCTTAAATGAAATTACCTGTATTTGGTTGGTTCATTCCAAATTTTGGAGTTCATCC : 448

D-Gb1-LPAAT5 : TGGGACTTGCATTGCGGAAAGATTCCCTGGGATACATAAAGTACATCCTTAAGAGCAGCTTAAATGAAATTACCTGTATTTGGTTGGTTCATTCCAAATTTTGGAGTTCATCC : 448

D-Gb2-LPAAT5 : ----- : -

tggga cttgcattgcggaagattccctgggatacataaagtacatccttaagagcagctt atgaaattacctgtat ttggttgggtcattccaaat tttggagttcatcc

\* 460 \* 480 \* 500 \* 520 \* 540 \* 560

A-Gh-LPAAT5 : CTGTGGAAAGGAAGTGGGAGTTGATGAGGC AAAAATGCGCCAGATGCTTTC AAAAATTC AAAGATCCTCGAGATCCCTTTGGCTTGTTCTCTTTCCAAAGGAACAGATTT : 560

A-Gb2-LPAAT5 : CTGTGGAAAGGAAGTGGGAGTTGATGAGGC AAAAATGCGCCAGATGCTTTC AAAAATTC AAAGATCCTCGAGATCCCTTTGGCTTGTTCTCTTTCCAAAGGAACAGATTT : 560

D-Gh-LPAAT5 : CTGTGGAAAGGAAGTGGGAGTTGATGAGGC AAAAATGCGCCAGATGCTTTC AAAAATTC AAAGATCCTCGAGATCCCTTTGGCTTGTTCTCTTTCCAAAGGAACAGATTT : 560

D-Gb1-LPAAT5 : CTGTGGAAAGGAAGTGGGAGTTGATGAGGC AAAAATGCGCCAGATGCTTTC AAAAATTC AAAGATCCTCGAGATCCCTTTGGCTTGTTCTCTTTCCAAAGGAACAGATTT : 560

D-Gb2-LPAAT5 : ----- : -

ctgtggaaggaagtgagggttgatgaggcaaaaatgcgccagatgctttcaaaaattcaagatcctcgagatccctttggcttgttctctttcc gaaggaacagattt

\* 580 \* 600 \* 620 \* 640 \* 660 \*

A-Gh-LPAAT5 : CACTGAGCAGAAGTGCTTAAGAAATAAAAAATATGCAGCTGAAAATGGCTTGCCTATCCTAAAGAATTTGCTGCTTCCAAAATCAAAGGGTTTTAATGCCTGCTTGAAGAT : 672

A-Gb2-LPAAT5 : CACTGAGCAGAAGTGCTTAAGAAATAAAAAATATGCAGCTGAAAATGGCTTGCCTATCCTAAAGAATTTGCTGCTTCCAAAATCAAAGGGTTTTAATGCCTGCTTGAAGAT : 672

D-Gh-LPAAT5 : CACTGAGCAGAAGTGCTTAAGAAATAAAAAATATGCAGCTGAAAATGGCTTGCCTATCCTAAAGAATTTGCTGCTTCCAAAATCAAAGGGTTTTAATGCCTGCTTGAAGAT : 672

D-Gb1-LPAAT5 : CACTGAGCAGAAGTGCTTAAGAAATAAAAAATATGCAGCTGAAAATGGCTTGCCTATCCTAAAGAATTTGCTGCTTCCAAAATCAAAGGGTTTTAATGCCTGCTTGAAGAT : 672

D-Gb2-LPAAT5 : ----- : -

cactgagcagaagtgcttaagaa t aaaaatatgcagctgaaaatggcttgcctatcctaaagaat ttgctgcttccaaaatcaaagggttttaatgcctgcttgaagat

680 \* 700 \* 720 \* 740 \* 760 \* 780

A-Gh-LPAAT5 : TTGAGGAGCACTTTGGATG CAGTTTACGATGTGACCATTGGATATAAGCATCGCTGTCCATCATTCTTGGATAACGTCTTTGGGGTTGACCCTTCTGAAGTTCATATTCAC : 783

A-Gb2-LPAAT5 : TTGAGGAGCACTTTGGATG CAGTTTACGATGTGACCATTGGATATAAGCATCGCTGTCCATCATTCTTGGATAACGTCTTTGGGGTTGACCCTTCTGAAGTTCATATTCAC : 783

D-Gh-LPAAT5 : TTGAGGAGCACTTTGGATG CAGTTTACGATGTGACCATTGGATATAAGCATCGCTGTCCATCATTCTTGGATAACGTCTTTGGGGTTGACCCTTCTGAAGTTCATATTCAC : 783

D-Gb1-LPAAT5 : TTGAGGAGCACTTTGGATG CAGTTTACGATGTGACCATTGGATATAAGCATCGCTGTCCATCATTCTTGGATAACGTCTTTGGGGTTGACCCTTCTGAAGTTCATATTCAC : 783

D-Gb2-LPAAT5 : ----- : 96

ttgaggagcactttggATG cagTTTACGATGTGACCATTGGATATAAGCATCGCTGTCC TCATTCTTGGATAACGTCTTTGGGGTTGACCCTTCTGAAGTTCATATTCAC

\* 800 \* 820 \* 840 \* 860 \* 880 \*

A-Gh-LPAAT5 : ATCAGGCGTGTTACCCTGGATGACATCCCCTTGTCCGAAAGGGAAGTAACCTTCTTGGTTAATGGATAACATTC CAACGTAAGGATCAATTGCTTTCTAATTTCAATTCCGAAG : 895

A-Gb2-LPAAT5 : ATCAGGCGTGTTACCCTGGATGACATCCCCTTGTCCGAAAGGGAAGTAACCTTCTTGGTTAATGGATAACATTC CAACGTAAGGATCAATTGCTTTCTAATTTCAATTCCGAAG : 895

D-Gh-LPAAT5 : ATCAGGCGTGTTACCCTGGATGACATCCCCTTGTCCGAAAGGGAAGTAACCTTCTTGGTTAATGGATAACATTC CAACGTAAGGATCAATTGCTTTCTAATTTCAATTCTGAAG : 895

D-Gb1-LPAAT5 : ATCAGGCGTGTTACCCTGGATGACATCCCCTTGTCCGAAAGGGAAGTAACCTTCTTGGTTAATGGATAACATTC CAACGTAAGGATCAATTGCTTTCTAATTTCAATTCCGAAG : 895

D-Gb2-LPAAT5 : ATCAGGCGTGTTACCCTGGATGACATCCCCTTGTCCGAAAGGGAAGTA-----TTCAATTCACAAGCAGCATC-----AAGAAAGTGCTTGCTGGAAAAACTTCAATTT----- : 192

ATCAGGcGTGTTACCCTGGATGACATCCCCTTGTCCGAAAG GAAGTAac tcTTggTTaAtggatAcatTCcaacgtAAGgAtcaaTTGCTtttctAAttTcaATTc gaag

900 \* 920 \* 940 \* 960 \* 980 \* 1000

A-Gh-LPAAT5 : GTTATTTCCCTCTGCATGGAGCAGAAATTGAACCTCTCTACAGTCAAGTGCCTCATAAAACGTCATGCTGGTGCCTTGTCTTGACTGGTGCATTCACATTTTAAACCTTTTCTC : 1007

A-Gb2-LPAAT5 : GTTATTTCCCTCTGCATGGAGCAGAAATTGAACCTCTCTACAGTCAAGTGCCTCATAAAACGTCATGCTGGTGCCTTGTCTTGACTGGTGCATTCACATTTTAAACCTTTTCTC : 1006

D-Gh-LPAAT5 : GTTATTTCCCTCTGCATGGAGCAGAAATTGAACCTCTCTACAGTCAAGTGCCTCATAAAACGTCATGCTGGTGCCTTGTCTTTACTGGTGCATTCATTTTAAACCTTTTCTC : 1007

D-Gb1-LPAAT5 : GTTATTTCCCTCTGCATGGAGCAGAAATTGAACCTCTCTACAGTCAAGTGCCTCATAAAACGTCATGCTGGTGCCTTGTCTTTACTGGTGCATTCATTTTAAACCTTTTCTC : 1007

D-Gb2-LPAAT5 : GACATGACTTCCAGCATCATCCAAATGGGGAGGTTCAAT---GTCGGGAGCTTAA----- : 243

GttATttCcctCtGCATggagCagAattGaAccTctcTacaGTcaaGtGCcTcAtaaacgtcatgctggt t t a g gcat a t c

\* 1020 \* 1040 \* 1060 \* 1080 \* 1100 \* 1120

A-Gh-LPAAT5 : TTCCATTTGGTTTAAAGATTTTGTATCGTTATCTTGTTCCTATATGGTTTCGGCTACTTATTTAAACATCCGTCCAGAACCCTATCTTCAACTTTGTCAAAACTAGTCTTTAA : 1119

A-Gb2-LPAAT5 : CTTCATTTGACATGAC-TTCCAGCATCATCCAAATGGGAAGGT-TCATGTCGGGAGCTTAA----- : 1065

D-Gh-LPAAT5 : TTCCATTTGGTTTAAAGATTTTGTATCGTTATCTTGTTCCTATATGGTTTCGGCAACTTATTTAAACATCCGTCCAGAACCCTATCTTCAACTTTGTCAAAACTAGTCTTTAA : 1119

D-Gb1-LPAAT5 : TTCCATTTGGTTTAAAGATTTTGTATCGTTATCTTGTTCCTATATGGTTTCGGCAACTTATTTAAACATCCGTCCAGAACCCTATCTTCAACTTTGTCAAAACTAGTCTTTAA : 1119

D-Gb2-LPAAT5 : ----- : -

t catttg t a tt g atc t tg t t t tcgg cttta

LPAATB

A-Gh-LPAATB : ATGGAGA... 113
A-Gb1-LPAATB : ATGGAGA... 113
A-Gb2-LPAATB : ATGGAGA... 113
D-Gh-LPAATB : ATGGAGA... 113
D-Gb1-LPAATB : ATGGAGA... 113
D-Gb2-LPAATB : ATGGAGA... 113

A-Gh-LPAATB : AATAACA... 226
A-Gb1-LPAATB : AATAACA... 226
A-Gb2-LPAATB : AATAACA... 226
D-Gh-LPAATB : AATAACA... 226
D-Gb1-LPAATB : AATAACA... 226
D-Gb2-LPAATB : AATAACA... 226

A-Gh-LPAATB : CAACATTC... 339
A-Gb1-LPAATB : CAACATTC... 339
A-Gb2-LPAATB : CAACATTC... 339
D-Gh-LPAATB : CAACATTC... 339
D-Gb1-LPAATB : CAACATTC... 339
D-Gb2-LPAATB : CAACATTC... 339

A-Gh-LPAATB : GGAAATCC... 452
A-Gb1-LPAATB : GGAAATCC... 452
A-Gb2-LPAATB : GGAAATCC... 452
D-Gh-LPAATB : GGAAATCC... 452
D-Gb1-LPAATB : GGAAATCC... 452
D-Gb2-LPAATB : GGAAATCC... 452

A-Gh-LPAATB : AACGTCGG... 565
A-Gb1-LPAATB : AACGTCGG... 565
A-Gb2-LPAATB : AACGTCGG... 565
D-Gh-LPAATB : AACGTCGG... 529
D-Gb1-LPAATB : AACGTCGG... 565
D-Gb2-LPAATB : AACGTCGG... 565

A-Gh-LPAATB : CCATGAAA... 678
A-Gb1-LPAATB : CCATGAAA... 678
A-Gb2-LPAATB : CCATGAAA... 678
D-Gh-LPAATB : CCATGAAA... 642
D-Gb1-LPAATB : CCATGAAA... 678
D-Gb2-LPAATB : CCATGAAA... 678

A-Gh-LPAATB : CATTAGCC... 791
A-Gb1-LPAATB : CATTAGCC... 791
A-Gb2-LPAATB : CATTAGCC... 791
D-Gh-LPAATB : CATTAGCC... 755
D-Gb1-LPAATB : CATTAGCC... 791
D-Gb2-LPAATB : CATTAGCC... 791

A-Gh-LPAATB : TCTTCCTC... 904
A-Gb1-LPAATB : TCTTCCTC... 904
A-Gb2-LPAATB : TCTTCCTC... 904
D-Gh-LPAATB : TCTTCCTC... 868
D-Gb1-LPAATB : TCTTCCTC... 904
D-Gb2-LPAATB : TCTTCCTC... 904

A-Gh-LPAATB : CCGATGAC... 936
A-Gb1-LPAATB : CCGATGAC... 936
A-Gb2-LPAATB : CCGATGAC... 936
D-Gh-LPAATB : CCGATGAC... 900
D-Gb1-LPAATB : CCGATGAC... 936
D-Gb2-LPAATB : CCGATGAC... 936
